# Supplementary material for: Acteoside alleviates UUO-induced inflammation and fibrosis by regulating the HMGN1/TLR4/TREM1 signaling pathway
Source: PeerJ. 2023 Jan 18;11:e14765. doi: 10.7717/peerj.14765 (PMC9864189; doi:10.7717/peerj.14765)
Supplement: Supplemental Information 3 [file peerj-11-14765-s003.xlsx]

## Sheet: F4 80
GROUP	SAMPLE	The number of activated macrophages	The mean number of activated macrophages
Sham	CON1	15/12/13/8/11/8/9/8	10.5
	CON2	14/6/9/14/20/14/14/6	12.125
	CON3	8/5/9/5/12/11/7/5	7.75
	CON4	21/8/8/9/14/10/12/10/	11.5
	CON5	14/13/3/9/4/	8.6
UUO+saline	UUO1	/73/83/97/93/78/70/75	81.286
	UUO2	82/87/85/70/62/88/94/106/	84.25
	UUO3	71/83/95/52/118/75/97/83	84.25
	UUO4	79/77/72/81/87/93/83/80/89/82	82.3
	UUO5	106/102/93/108/133/90/108/84/	103
UUO+Act	UUO1+Act	51/36/20/31/37/35/	35
	UUO2+Act	53/55/37/43/56/68	52
	UUO3+Act	57/47/50/53/48/43	49.67
	UUO4+Act	13/36/46/43/57/50/60/59/	45.5
	UUO5+Act	50/57/51/60/47/42	51.17

## Sheet: TREM
GROUP	SAMPLE	The number of activated macrophages	mean number of activated macrophages
Sham	CON1	2/3/4/7/5/6/4/2/	4.13
	CON2	2/2/1/6/2/3/2	2.57
	CON3	3/2/4/2/1/4	2.67
	CON4	3/6/3/4/7/1	4
	CON5	2/3/5/3/3	3.2
UUO+saline	UUO1	46/30/32/49/65/46/50/52/52/55	47.7
	UUO2	62/56/58/50/52/48/41/58/62/61	54.8
	UUO3	52/57/52/63/69/56/75/62/70/52	60.8
	UUO4	79/74/66/79/78/73/69/64/72/63	71.7
	UUO5	63/67/64/70/62/72/71/62/68/70	66.9
UUO+Act	UUO1+Act	29/37/32/28/40/35/34/38	34.125
	UUO2+Act	43/41/39/36	39.75
	UUO3+Act	36/27/31/29/31/28	30.33
	UUO4+Act	25/28/30/26/28/25/26	26.86
	UUO5+Act	31/37/32/43/	35.75

## Sheet: Masson
SAMPLE	mean Fibrotic area(%)
CON1	0.043
CON2	0.028
CON3	0.053
CON4	0.046
CON5	0.065
UUO1	0.453
UUO2	0.532
UUO3	0.643
UUO4	0.355
UUO5	0.435
UUO1+Act	0.323
UUO2+Act	0.254
UUO3+Act	0.276
UUO4+Act	0.353
UUO5+Act	0.289

## Sheet: HE
SAMPLE	paller‘s score	mean score
CON1	0/1/1	0.666
CON2	1/0/1	0.666
CON3	2/0/0	0.666
CON4	1/0	0.5
CON5	1/0	0.5
UUO1	4/5/3/3/4/3/4	3.714
UUO2	4/4/4/5/5/5	4.5
UUO3	5/4/5/5/4/5/4	4.571
UUO4	4/3/4/5/5/5/5/5/5/5	4.6
UUO5	5/5/5/4/5/5/5/	4.857
UUO1+Act	2/3/2/1/1/3/1/2/	1.875
UUO2+Act	1/2/2/4/3/3/2/1/	2.25
UUO3+Act	2/3/3/3/2/2/1/3	2.375
UUO4+Act	2/5/2/3/1/5/2/	2.857
UUO5+Act	2/4/4/2/3/2/2/2/	2.625

## Sheet: KIM-1
IOD/Area
UUO+saline						UUO+Act						Sham
Sum	57265	11078.3	0.193456	0.135518	0.135518	Sum	59140	8115.39	0.137223	0.124358	0.124358	Sum	54839	2860.48	0.0521614	0.0677903	0.0677903
Sum	162833	20486.5	0.125813			Sum	97195	10160.1	0.104533			Sum	43513	2894.57	0.0665219
Sum	73453	9904.09	0.134836			Sum	67059	12026.9	0.179348			Sum	17997	1554.85	0.0863947
Sum	119710	14244.5	0.118992			Sum	106860	16520.4	0.154598			Sum	10664	704.712	0.0660832
Sum	197733	20661.6	0.104492			Sum	79281	8013.41	0.101076			Sum	0	0	0
Sum	104402	16988.4	0.162721	0.159982	0.159982	Sum	54313	6421.23	0.118226	0.0943287	0.0943287	Sum	8995	360.488	0.0400765	0.0675276	0.0675276
Sum	125598	19580.3	0.155897			Sum	46436	3947.27	0.0850045			Sum	13786	860.718	0.0624342
Sum	54147	9487.5	0.175217			Sum	84794	6009.45	0.0708712			Sum	1248	109.929	0.0880841
Sum	69671	10271.1	0.147423			Sum	86722	7539.4	0.0869376			Sum	1270	70.4691	0.0554875
Sum	108895	18014.1	0.165426			Sum	30315	2902.57	0.0957469			Sum	1430	120.109	0.0839923
Sum	119477	19712.3	0.164988			Sum	119315	10228.6	0.0857279			Sum	2057	154.462	0.0750909
Sum	102906	15251.1	0.148204
Sum	85786	15463	0.18025	0.177526	0.177526	Sum	115921	9204.95	0.0794071	0.0854584	0.0854584	Sum	18366	1762.79	0.095981	0.0576486	0.0576486
Sum	88556	18313.2	0.206798			Sum	86662	5681.6	0.0655605			Sum	5531	441.568	0.0798351
Sum	75915	13840.2	0.182312			Sum	48531	3426.65	0.0706075			Sum	74	9.10748	0.123074
Sum	113873	14382	0.126299			Sum	110189	9968.96	0.0904715			Sum	2535	138.863	0.0547783
Sum	68956	13237.5	0.19197			Sum	95146	8229.8	0.0864965			Sum	194	21.1448	0.108994
Sum	68093	11921.7	0.17508	0.162168	0.162168	Sum	69396	6111.96	0.0880737	0.105812	0.105812	Sum	10	0.758548	0.0758548	0.0625932	0.0625932
Sum	117363	13112.4	0.111725			Sum	27570	2817.97	0.102212			Sum	1464	154.225	0.105345
Sum	78679	14542.5	0.184834			Sum	105105	8366.04	0.079597			Sum	10238	892.33	0.0871587
Sum	94010	14166.3	0.150689			Sum	11430	1306.67	0.114319			Sum	1465	165.773	0.113156
Sum	133628	22284.1	0.166762			Sum	130857	13559.8	0.103623			Sum	11618	1014.94	0.0873593
Sum	77263	14209.9	0.183916			Sum	102000	10515.6	0.103094			Sum	0	0	0
Sum	84364	11519.1	0.136541	0.161964	0.161964	Sum	36517	1927.23	0.0527763	0.1035	0.1035	Sum	5310	463.35	0.0872599	0.0694322	0.0694322
Sum	57688	8772.27	0.152064			Sum	38311	2730.69	0.071277			Sum	639	69.0154	0.108005
Sum	141805	23721.8	0.167284			Sum	64164	7568.6	0.117957			Sum	144	15.6071	0.108383
Sum	92428	14506.5	0.156949			Sum	50585	4869.89	0.0962714			Sum	19369	1172.18	0.0605183
Sum	92428	14506.5	0.156949			Sum	50585	4869.89	0.0962714			Sum	19369	1172.18	0.0605183
Sum	83772	16921.4	0.201993			Sum	107561	5454.69	0.0507126			Sum	131	17.2574	0.131736
Mean	11.492		16.5432	16.5432	Mean	15.6366		13.3064	13.3064	Mean	4.23775		2.66788	2.66788
Mean	24.1017				Mean	16.3083				Mean	4.29461
Mean	9.61562				Mean	16.8444				Mean	2.67156
Mean	9.81026				Mean	13.3014				Mean	2.13549
Mean	27.6965				Mean	13.3113				Mean	0
Mean	23.8266		23.9459	23.9459	Mean	10.8834		9.85894	9.85894	Mean	0.982257		1.47355	1.47355
Mean	35.7305				Mean	7.33693				Mean	1.718
Mean	11.1095				Mean	8.23212				Mean	1.89533
Mean	22.426				Mean	12.4618				Mean	0.978738
Mean	26.0319				Mean	7.71959				Mean	1.969
Mean	25.8014				Mean	12.5197				Mean	1.298
Mean	22.6951
Mean	16.1073		18.6118	18.6118	Mean	12.8921		9.52733	9.52733	Mean	2.55847		1.40293	1.40293
Mean	19.8195				Mean	9.79587				Mean	1.49178
Mean	17.3219				Mean	4.77915				Mean	1.51791
Mean	16.0873				Mean	11.5248				Mean	1.44649
Mean	23.7231				Mean	8.64475				Mean	0
Mean	21.7154		17.882	17.882	Mean	7.3727		11.4448	11.4448	Mean	0.758548		1.96347	1.96347
Mean	12.1299				Mean	7.39626				Mean	1.60651
Mean	14.1189				Mean	8.27501				Mean	2.83279
Mean	17.0268				Mean	4.8939				Mean	2.51172
Mean	27.5452				Mean	25.7301				Mean	2.89157
Mean	14.7559				Mean	15.0009				Mean	1.17971
Mean	10.6856		20.6159	20.6159	Mean	2.88077		7.02806	7.02806	Mean	2.01457		1.80936	1.80936
Mean	11.5729				Mean	3.94609				Mean	1.72539
Mean	37.7735				Mean	12.2074				Mean	1.56071
Mean	10.5964				Mean	12.3601				Mean	1.72379
Mean	17.2923				Mean	4.74667				Mean	1.91423
Mean	35.7746				Mean	6.02729				Mean	1.91749

## Sheet: aSMA
IOD/Area
UUO+saline						UUO+Act						Sham
Stats	Area	IOD				Stats	Area	IOD				Stats	Area	IOD
Sum	559777	107523	0.192082	0.172926	0.172926	Sum	409704	57755	0.140968	0.142976	0.142976	Sum	20026	2428.05	0.121245	0.112228	0.112228
Sum	738697	99218.4	0.134315			Sum	246056	41828.4	0.169995			Sum	9916	1274.72	0.128552
Sum	149364	30627.5	0.205052			Sum	700093	84099.3	0.120126			Sum	44541	4193.96	0.0941595
Sum	316591	52374.3	0.165432			Sum	731820	100276	0.137022			Sum	102339	11012.4	0.107607
Sum	278350	43576.3	0.156552			Sum	517856	66591.9	0.128592			Sum	31641	3867.84	0.122241
Sum	202319	43322.7	0.21413			Sum	445580	65561.3	0.147137			Sum	1028335	106860	0.103915
Sum	953246	136238	0.14292			Sum	300499	47175.7	0.156991			Sum	97391	10506.4	0.107879
Sum	23908	5909.87	0.247192	0.192079	0.192079	Sum	1291425	149276	0.11559	0.15103	0.15103	Sum	661030	90080	0.136272	0.113544	0.113544
Sum	39209	8759.92	0.223416			Sum	515085	87275.6	0.169439			Sum	639579	84921.4	0.132777
Sum	563540	87770.1	0.155748			Sum	247657	35908.7	0.144994			Sum	759947	70830.2	0.0932041
Sum	659427	93233.2	0.141385			Sum	118800	17921.5	0.150854			Sum	1448709	173117	0.119498
Sum	400859	77227	0.192654			Sum	744874	129813	0.174275			Sum	308698	39492.1	0.127931
Sum	331551	62583.9	0.188761	0.18728	0.18728	Sum	127997	18624.6	0.145508	0.152375	0.152375	Sum	255307	30522.9	0.119554	0.119459	0.119459
Sum	134959	27283.6	0.202162			Sum	49525	8781.89	0.177322			Sum	210222	25252.6	0.120124
Sum	146352	27833.2	0.19018			Sum	194781	26173	0.134371			Sum	298936	35648.2	0.11925
Sum	253414	46052.7	0.181729			Sum	456898	73631.6	0.161155			Sum	237665	28260	0.118907
Sum	387662	67286.4	0.17357			Sum	393050	56409.2	0.143517			Sum	76148	9636.59	0.126551
Sum	1023876	165270	0.161416	0.176064	0.176064	Sum	327591	50017	0.152681	0.156043	0.156043	Sum	206441	23737.9	0.114987	0.117102	0.117102
Sum	1022607	158915	0.155402			Sum	147966	26525.4	0.179267			Sum	1496103	184878	0.123573
Sum	434832	99645.5	0.229159			Sum	800535	119523	0.149304			Sum	104982	11136.6	0.106081
Sum	903231	142964	0.158281			Sum	756507	108119	0.142919			Sum	320101	39618	0.123767
Sum	178619	41946.7	0.234839	0.190475	0.190475	Sum	155788	25390.2	0.162979	0.152481	0.152481	Sum	463683	50614.1	0.109157	0.118744	0.118744
Sum	389456	63382.9	0.162747			Sum	473032	65226.8	0.137891			Sum	402996	46904.4	0.116389
Sum	271274	54189.8	0.19976			Sum	727947	108871	0.14956			Sum	1408669	168318	0.119487
Sum	398750	69747.3	0.174915			Sum	160748	23414.6	0.14566			Sum	78429	10561	0.134657
Sum	289950	52223.6	0.180112			Sum	138698	23067.6	0.166315			Sum	341895	38986.4	0.11403

## Sheet: Mcp-1
IOD/Area
Sum	104885	24707.1	0.235564	0.214926	0.214926	Sum	9414	1235.18	0.131207	0.154471	0.154471	Sum	102313	12456.6	0.12175	0.12175	0.12175
Sum	154368	28474.1	0.184456			Sum	36982	5322.27	0.143915			Sum	45034	6704.64	0.14888
Sum	131157	24275.8	0.185089			Sum	172	28.4366	0.165329			Sum	45100	6163.26	0.136658
Sum	83304	16996.4	0.204029			Sum	154	25.7486	0.167199			Sum	32577	4667.75	0.143284
Sum	92244	22409.4	0.242936			Sum	490	80.7061	0.164706			Sum	69376	11457.5	0.16515
Sum	82966	19703.1	0.237484			Sum	8431	1036.46	0.122935			Sum	22233	3135.59	0.141033
					0.134958
Sum	222280	25844.8	0.116271	0.134958		Sum	21070	1382.32	0.0656063	0.149372	0.149372	Sum	91100	10163.6	0.111566	0.103696	0.103696
Sum	160718	21370.9	0.132972			Sum	8493	1186.97	0.139759			Sum	48446	6797.8	0.140317
Sum	128715	16990.3	0.131999			Sum	4936	609.464	0.123473			Sum	128619	13130.3	0.102087
Sum	154652	18647.4	0.120577			Sum	12726	1820.04	0.143017			Sum	129602	11706.7	0.0903284
Sum	118473	16574.9	0.139904		0.18463	Sum	2591	495.502	0.19124			Sum	132462	14677.4	0.110804
Sum	114812	19574.4	0.170491	0.18463		Sum	36088	3695.66	0.102407	0.141496	0.141496	Sum	83088	10836.5	0.130422	0.0956359	0.0956359
Sum	90166	17338.2	0.192292			Sum	3617	296.413	0.0819501			Sum	59984	5594.97	0.0932744
Sum	64773	13010.2	0.200859			Sum	3123	403.577	0.129227			Sum	122397	9736.75	0.0795505
Sum	96998	15772.4	0.162605		0.186491	Sum	4366	617.774	0.141496			Sum	92056	9773.94	0.106174
Sum	58745	11567.1	0.196904			Sum	22876	1679.02	0.0733967			Sum	131201	13585.2	0.103545
Sum	101297	21529.8	0.212542	0.186491		Sum	10349	1177.45	0.113774	0.134974	0.134974	Sum	99342	9814.89	0.098799	0.0766057	0.0766057
Sum	89407	17701.1	0.197984			Sum	4643	490.492	0.105641			Sum	136588	10191.4	0.0746139
Sum	140072	26101	0.18634		0.206952	Sum	14912	1379.12	0.0924838			Sum	124568	9822.63	0.0788536
Sum	106870	18181.5	0.170127			Sum	5401	728.997	0.134974			Sum	128644	9821.91	0.0763496
Sum	137391	22733.4	0.165465			Sum	42776	2987.54	0.0698415			Sum	142040	14631.6	0.10301
Sum	120696	30990.5	0.256765	0.206952		Sum	143	12.9947	0.0908722	0.131131	0.131131	Sum	119203	9041.89	0.0758529	0.064597	0.064597
Sum	71922	17077.1	0.237439			Sum	2844	376.176	0.13227			Sum	178708	11904.3	0.0666132
Sum	125501	18251.2	0.145427			Sum	2523	145.874	0.0578176			Sum	88233	7890.56	0.0894287
Sum	70241	14084.4	0.200516			Sum	9023	1095.54	0.121417			Sum	150489	8917.22	0.0592549
Sum	64809	12612.7	0.194613			Sum	1765	246.58	0.139706			Sum	139893	7927.31	0.056667
IOD
UUO +saline					UUO+Act						Sham
Mean	40.7037		36.9559	36.9559	Mean	18.7599		15.8562	15.8562		Mean	3.66523		4.23787	4.23787
Mean	39.1665				Mean	20.8219					Mean	9.30468
Mean	33.4838				Mean	12.0142					Mean	2.84366
Mean	36.5515				Mean	11.3021					Mean	2.57486
Mean	33.3473				Mean	17.9866					Mean	3.22825
Mean	38.4826				Mean	14.2527					Mean	3.81053
Mean	34.4138		37.7608	37.7608	Mean	15.7089		16.3958	16.3958		Mean	2.9163		4.00365	4.00365
Mean	37.2316				Mean	15.0394					Mean	4.69159
Mean	39.7898				Mean	11.3781					Mean	2.61573
Mean	45.3709				Mean	16.1028					Mean	4.78957
Mean	31.9978				Mean	23.7498					Mean	5.00507
Mean	38.9153		37.5562	37.5562	Mean	24.1886		15.9493	15.9493		Mean	4.13385		3.00728	3.00728
Mean	39.6755				Mean	9.90261					Mean	1.5851
Mean	38.7209				Mean	11.7452					Mean	2.80262
Mean	35.5233				Mean	11.9632					Mean	4.38137
Mean	34.9459				Mean	21.947					Mean	2.13345
Mean	45.8081		36.2852	36.2852	Mean	11.3467		15.5106	15.5106		Mean	3.46307		3.58922	3.58922
Mean	38.3142				Mean	17.755					Mean	2.7099
Mean	29.1305				Mean	13.6236					Mean	3.11313
Mean	36.7303				Mean	15.3708					Mean	4.55623
Mean	31.4431				Mean	19.4569					Mean	4.10376
Mean	39.9877		38.778	38.778	Mean	9.98001		13.6065	13.6065		Mean	1.18134		2.93525	2.93525
Mean	39.622				Mean	21.8829					Mean	4.27473
Mean	34.0507				Mean	9.44977					Mean	1.15773
Mean	39.6745				Mean	12.7389					Mean	4.38217
Mean	40.5553				Mean	13.9811					Mean	3.6803

## Sheet: β-cantien
IOD/Area
UUO+saline						UUO+Act						Sham
Stats	Area	IOD				Stats	Area	IOD				Stats	Area	IOD
Sum	1584	884.537	0.55842	0.500587	0.500587	Sum	13136	4548.28	0.346245	0.301572	0.301572	Sum	26964	5474.71	0.203038	0.200309	0.200309
Sum	17901	7361.86	0.411254			Sum	15773	5206.02	0.330059			Sum	230449	39488.7	0.171355
Sum	3131	1466.02	0.468226			Sum	4142	1034.15	0.249673			Sum	11897	2927.14	0.24604
Sum	2197	1070.72	0.487357			Sum	3054	721.897	0.236378			Sum	29100	5660.7	0.194526
Sum	2329	1345.41	0.577678			Sum	6919	2390.53	0.345503			Sum	138743	25887.4	0.186586
Sum	2197	965.383	0.43941	0.44054	0.44054	Sum	7895	2232.96	0.282832	0.289751	0.289751	Sum	35625	3530.84	0.0991113	0.184977	0.184977
Sum	3430	1403.99	0.409326			Sum	9578	2430.97	0.253808			Sum	12448	2768.59	0.222412
Sum	7578	3081.7	0.406664			Sum	3388	1291.7	0.381256			Sum	5009	1054.33	0.210487
Sum	4698	2451.83	0.521888			Sum	13382	3829.39	0.28616			Sum	9846	1940.73	0.197108
Sum	6478	2755.83	0.425414			Sum	28009	6853.75	0.244698			Sum	4585	897.589	0.195766
Sum	6532	3644	0.557868	0.505448	0.505448	Sum	29182	7071.79	0.242334	0.289362	0.289362	Sum	57204	11873.1	0.207557	0.188634	0.188634
Sum	15059	6853.1	0.455084			Sum	11046	3630.64	0.328684			Sum	52305	11808.6	0.225764
Sum	7950	4188.96	0.526913			Sum	5750	1432.2	0.249078			Sum	26689	4182.58	0.156716
Sum	3313	1717.88	0.518527			Sum	9626	3137.72	0.325963			Sum	459033	68150.4	0.148465
Sum	10471	4909.32	0.468849			Sum	5646	1698.04	0.300751			Sum	31429	6432.53	0.204669
Sum	4426	2949.35	0.666369	0.523567	0.523567	Sum	9276	3488.59	0.376088	0.317427	0.317427	Sum	55835	10705.3	0.19173	0.198668	0.198668
Sum	4146	1443.42	0.348147			Sum	13659	4093.43	0.299688			Sum	277438	48499.2	0.174811
Sum	1283	745.277	0.580887			Sum	7503	2660.79	0.354631			Sum	257357	42582.4	0.165461
Sum	4443	2477.16	0.557541			Sum	32486	8717.54	0.268348			Sum	53737	11762.3	0.218887
Sum	2102	977.195	0.464888			Sum	32978	9510.28	0.288383			Sum	2510	608.554	0.242452
Sum	2623	1354.07	0.516231	0.552581	0.552581	Sum	5920	1709.4	0.288751	0.277232	0.277232	Sum	9398	2161.38	0.229982	0.199474	0.199474
Sum	7371	2857.42	0.387658			Sum	7829	2338.68	0.29872			Sum	18618	3544.25	0.190367
Sum	11363	4874.13	0.428947			Sum	36420	8674.32	0.238175			Sum	47214	9473.5	0.20065
Sum	4214	2917.73	0.69239			Sum	4927	1160.77	0.235594			Sum	55212	11692.9	0.211782
Sum	6656	4909.99	0.737679			Sum	3861	1254.51	0.324919			Sum	190906	31420.6	0.164587

## Sheet: correlation analyses
	F4-80+ cell number	HMGN1 protein			F4-80+ cell number	TLR4 Protein			HMGN1 protein	TLR4 Protein
	10.5	0.0734134			10.5	0.0729356			0.0734134	0.0729356
	12.125	0.0807784			12.125	0.0599924			0.0807784	0.0599924
	7.75	0.0713321			7.75	0.0813105			0.0713321	0.0813105
	11.5	0.073361			11.5	0.080729			0.073361	0.080729
	8.6	0.0722304			8.6	0.0698604			0.0722304	0.0698604
	35	0.153924			35	0.128031			0.153924	0.128031
	52	0.170767			52	0.135127			0.170767	0.135127
	49.67	0.177229			49.67	0.137919			0.177229	0.137919
	45.5	0.169232			45.5	0.11444			0.169232	0.11444
	51.17	0.171254			51.17	0.113763			0.171254	0.113763
	81.286	0.264279			81.286	0.204187			0.264279	0.204187
	84.25	0.237265			84.25	0.189126			0.237265	0.189126
	84.25	0.254084			84.25	0.219633			0.254084	0.219633
	82.3	0.258203			82.3	0.194486			0.258203	0.194486
	103	0.259525			103	0.207266			0.259525	0.207266
	STAT-3 protein	HMGN1 protein			STAT-3 protein	TLR4 Protein
	2.33	0.0734134			2.33	0.0729356
	2.14	0.0807784			2.14	0.0599924
	1.57	0.0713321			1.57	0.0813105
	1.67	0.073361			1.67	0.080729
	2	0.0722304			2	0.0698604
	6.5	0.153924			6.5	0.128031
	7.5	0.170767			7.5	0.135127
	9.2	0.177229			9.2	0.137919
	7.1	0.169232			7.1	0.11444
	8.1	0.171254			8.1	0.113763
	11.83	0.264279			11.83	0.204187
	13.86	0.237265			13.86	0.189126
	12.29	0.254084			12.29	0.219633
	13.14	0.258203			13.14	0.194486
	13.8	0.259525			13.8	0.207266
	TREM protein	HMGN1 protein			TREM protein	TLR4 Protein
	4.13	0.0734134			4.13	0.0729356
	2.57	0.0807784			2.57	0.0599924
	2.67	0.0713321			2.67	0.0813105
	4	0.073361			4	0.080729
	3.2	0.0722304			3.2	0.0698604
	34.125	0.153924			34.125	0.128031
	39.75	0.170767			39.75	0.135127
	30.33	0.177229			30.33	0.137919
	26.86	0.169232			26.86	0.11444
	35.75	0.171254			35.75	0.113763
	47.7	0.264279			47.7	0.204187
	54.8	0.237265			54.8	0.189126
	60.8	0.254084			60.8	0.219633
	71.7	0.258203			71.7	0.194486
	66.9	0.259525			66.9	0.207266
	KIM-1 protein	HMGN1 protein			KIM-1 protein	TLR4 Protein
	0.0677903	0.0734134			0.0677903	0.0729356
	0.0675276	0.0807784			0.0675276	0.0599924
	0.0576486	0.0713321			0.0576486	0.0813105
	0.0625932	0.073361			0.0625932	0.080729
	0.0694322	0.0722304			0.0694322	0.0698604
	0.124358	0.153924			0.124358	0.128031
	0.0943287	0.170767			0.0943287	0.135127
	0.0854584	0.177229			0.0854584	0.137919
	0.105812	0.169232			0.105812	0.11444
	0.1035	0.171254			0.1035	0.113763
	0.135518	0.264279			0.135518	0.204187
	0.159982	0.237265			0.159982	0.189126
	0.177526	0.254084			0.177526	0.219633
	0.162168	0.258203			0.162168	0.194486
	0.161964	0.259525			0.161964	0.207266
	α-SMA protein	HMGN1 protein			α-SMA protein	TLR4 Protein
	0.112228	0.0734134			0.112228	0.0729356
	0.113544	0.0807784			0.113544	0.0599924
	0.119459	0.0713321			0.119459	0.0813105
	0.117102	0.073361			0.117102	0.080729
	0.118744	0.0722304			0.118744	0.0698604
	0.142976	0.153924			0.142976	0.128031
	0.15103	0.170767			0.15103	0.135127
	0.152375	0.177229			0.152375	0.137919
	0.156043	0.169232			0.156043	0.11444
	0.152481	0.171254			0.152481	0.113763
	0.172926	0.264279			0.172926	0.204187
	0.192079	0.237265			0.192079	0.189126
	0.18728	0.254084			0.18728	0.219633
	0.176064	0.258203			0.176064	0.194486
	0.190475	0.259525			0.190475	0.207266
	Mcp-1 protein	HMGN1 protein			Mcp-1 protein	TLR4 Protein
	0.12175	0.0734134			0.12175	0.0729356
	0.103696	0.0807784			0.103696	0.0599924
	0.0956359	0.0713321			0.0956359	0.0813105
	0.0766057	0.073361			0.0766057	0.080729
	0.064597	0.0722304			0.064597	0.0698604
	0.154471	0.153924			0.154471	0.128031
	0.149372	0.170767			0.149372	0.135127
	0.141496	0.177229			0.141496	0.137919
	0.134974	0.169232			0.134974	0.11444
	0.131131	0.171254			0.131131	0.113763
	0.214926	0.264279			0.214926	0.204187
	0.134958	0.237265			0.134958	0.189126
	0.18463	0.254084			0.18463	0.219633
	0.186491	0.258203			0.186491	0.194486
	0.206952	0.259525			0.206952	0.207266
	β-cantein	HMGN1 protein			β-cantein	TLR4 Protein
	0.200309	0.0734134			0.200309	0.0729356
	0.184977	0.0807784			0.184977	0.0599924
	0.188634	0.0713321			0.188634	0.0813105
	0.198668	0.073361			0.198668	0.080729
	0.199474	0.0722304			0.199474	0.0698604
	0.301572	0.153924			0.301572	0.128031
	0.289751	0.170767			0.289751	0.135127
	0.289362	0.177229			0.289362	0.137919
	0.317427	0.169232			0.317427	0.11444
	0.277232	0.171254			0.277232	0.113763
	0.500587	0.264279			0.500587	0.204187
	0.44054	0.237265			0.44054	0.189126
	0.505448	0.254084			0.505448	0.219633
	0.523567	0.258203			0.523567	0.194486
	0.552581	0.259525			0.552581	0.207266

## Sheet: HMGN1
UUO+saline						UUO+Act						Sham
Stats	Area	IOD				Stats	Area	IOD				Stats	Area	IOD
Sum	7078	2076.38	0.293357	0.264279	0.264279	Sum	11308	2690.41	0.237921	0.153924	0.153924	Sum	111130	9612.12	0.0864943	0.0734134	0.0734134
Sum	4862	1253.91	0.2579			Sum	27164	3617.82	0.133184			Sum	95321	5016.01	0.0526223
Sum	26439	5913.62	0.22367			Sum	20716	2576.9	0.124392			Sum	52319	3476.26	0.0664436
Sum	4772	1043.77	0.218728			Sum	10238	1382	0.134987			Sum	71915	5431.78	0.0755305
Sum	3648	1195.59	0.327739			Sum	22790	3170.87	0.139134			Sum	22299	1917.18	0.0859763
Sum	1665	350.447	0.210479	0.237265	0.237265	Sum	8820	1375.06	0.155902	0.170767	0.170767	Sum	17898	1505.92	0.0841389	0.0807784	0.0807784
Sum	14189	3138.58	0.221198			Sum	12653	2289.98	0.180983			Sum	105098	7981.53	0.0759437
Sum	2883	662.145	0.229672			Sum	26688	3701.81	0.138707			Sum	155006	11859.6	0.0765106
Sum	2490	545.508	0.21908			Sum	90278	15336.1	0.169876			Sum	92540	8422.57	0.0910155
Sum	7240	2214.69	0.305896			Sum	14272	2973.82	0.208367			Sum	132965	10143	0.0762835
Sum	36105	8339.94	0.230991	0.254084	0.254084	Sum	23703	4909.03	0.207106	0.177229	0.177229	Sum	199912	8553.36	0.0427856	0.0713321	0.0713321
Sum	3849	972.691	0.252713			Sum	34170	6924.98	0.202663			Sum	154465	9885.59	0.0639989
Sum	10937	2797.01	0.255738			Sum	63006	7023.81	0.111478			Sum	42988	3323.82	0.0773198
Sum	7421	1994.66	0.268785			Sum	30927	6711.7	0.217018			Sum	29159	2582.01	0.0885494
Sum	2911	763.236	0.26219			Sum	48023	7101.79	0.147883			Sum	113344	9521.65	0.0840067
Sum	12849	3448.15	0.268359	0.258203	0.258203	Sum	5837	1160.63	0.198841	0.169232	0.169232	Sum	79641	6226.32	0.0781798	0.073361	0.073361
Sum	12924	3308.6	0.256005			Sum	56120	8551.29	0.152375			Sum	127862	10605.3	0.0829433
Sum	8172	1920.66	0.23503			Sum	7069	1166.61	0.165032			Sum	81823	6024.53	0.0736288
Sum	2026	539.577	0.266326			Sum	28201	4234.08	0.150139			Sum	21307	1374.1	0.0644905
Sum	4513	1197.28	0.265297			Sum	14599	2624.47	0.179771			Sum	54893	3708.7	0.0675623
Sum	4192	1108.75	0.264492	0.259525	0.259525	Sum	37061	6372.96	0.171959	0.171254	0.171254	Sum	169390	10616.3	0.0626737	0.0722304	0.0722304
Sum	6705	1873.07	0.279354			Sum	31130	4499.03	0.144524			Sum	63068	4434.38	0.0703111
Sum	2254	525.786	0.233268			Sum	38937	5933.66	0.152391			Sum	64543	4440.35	0.0687967
Sum	9082	2328.83	0.256423			Sum	10902	2291.65	0.210205			Sum	56090	4797.51	0.0855324
Sum	13505	3566.5	0.264087			Sum	24980	4426.29	0.177193			Sum	144974	10704.6	0.0738381

[truncated: 1 more sheets: TLR４]
